# Supplementary material
Source: ML conference proceedings conference paper supplement (https://proceedings.mlr.press/v97/innes19a.html)
Supplement: Supplementary file [file innes19a-supp.pdf]

# Technical Supplement

## 1. Proof of Lemmas and Theorems

**Lemma 1.** Consider an agent with awareness  $A^t \subset A^+$ , and expert following (8-13). As  $k \rightarrow \infty$ , either  $PE(\pi_{t+k}) \rightarrow c \leq \beta$  or the expert utters (13) where  $\mathcal{A}' \neq \emptyset$ .

*Proof.* For finite  $\mu$ ,  $(t+k) - t' > \mu$  as  $k \rightarrow \infty$ , satisfying (8).

Given  $A^t$  remains fixed, the agent's policy will eventually converge to some policy  $\pi$ . If  $PE(\pi) < \beta$ , we are done. If  $PE(\pi) \geq \beta$ , then (9) will be satisfied.

Since the agent is  $\epsilon$ -greedy, at every time step it has a non-zero probability of performing all actions  $a \in v(\mathcal{A}_t)$ , meaning that eventually  $\mathcal{A}^e = \mathcal{A}^t$ . Further, since  $\pi \neq \pi_+$ , there must exist some  $b \in v(\mathcal{B}^+)$  and  $a' \in v(\mathcal{A}^+)$  such that  $\forall a \in \mathcal{A}^t, EU(a'|b) > EU(a|b)$ , thereby satisfying (11).

Since the agent is  $\epsilon$ -greedy, it is guaranteed to eventually perform  $a^* = \arg \max_{a \in v(\mathcal{A}^t)} EU(a|b)$  in in state  $b$ , thus making (12) true for a non-empty value of  $\mathcal{A}'$ .

(8-12) are not mutually exclusive, so all four will eventually be true at once, causing the expert to utter (13) for non-empty  $\mathcal{A}'$ .  $\square$

**Lemma 2.** Consider an agent with awareness  $\mathcal{X}^t \subset \mathcal{X}^+$ ,  $\mathcal{A}^t = \mathcal{A}^+$ . If  $\exists b', \exists b \neq b', b[\mathcal{B}^t] = b'[\mathcal{B}^t]$  and  $\pi_+(b) \neq \pi_+(b')$ , then as  $k \rightarrow \infty$ , either  $PE(\pi_{t+k}) \rightarrow c \leq \beta$ , or the expert utters (21) such that  $B' \notin \mathcal{B}^t$

*Proof.* If the agent converges to some policy  $\pi$  such that  $PE(\pi) \leq \beta$ , we are done.

Assume  $a = \pi_+(b)$  and  $a' = \pi_+(b')$ . Consider that for all  $k$ ,  $P(b_{t+k} = b) > 0$ , and (since the agent is  $\epsilon$ -greedy)  $P(\pi_{t+k}(b) = a') > 0$ , where  $a' = \pi_+(b')$ .

If  $PE(\pi) \geq \beta$ , then at some time  $t+k_1$  where  $(t+k_1) - t' > \mu$  and  $b_{t+k_1} = b$  the agent will perform  $a'$ , thus satisfying (8-12) and causing the expert to utter  $EU(a|w_{t+k_1}^b) > EU(a'|w_{t+k_1}^b)$ .

By similar reasoning, at some time  $b_{t+k_2} = b'$  the expert will utter  $EU(a', w_{t+k_2}^b) > EU(a, w_{t+k_2}^b)$ .

Under  $\mathcal{B}^t$ ,  $[[w_{t+k_1}^s]] = [[w_{t+k_2}^s]]$ , so the agent will ask (20) with answer  $B \notin \mathcal{B}^t$ .  $\square$

**Lemma 3.** Consider an  $\epsilon$ -greedy agent with awareness  $\mathcal{A}^t = \mathcal{A}^+$ ,  $scope_t(\mathcal{R}) \subseteq scope_+(\mathcal{R})$ . As  $k \rightarrow \infty$ , there exists a  $K$  such that  $\forall s, \forall k \geq K, \mathcal{R}_{t+k}(s) = \mathcal{R}_+(s)$ .

*Proof.* Since the  $\mathcal{A}^t = \mathcal{A}^+$ , and is  $\epsilon$ -greedy, then over infinite time the agent will eventually enter  $s$  at some time  $i$ , receiving reward  $\mathcal{R}_+(s)$ , and update its current reward function so that  $\mathcal{R}_i(s) = \mathcal{R}_+(s)$ . If the agent has previously encountered another  $s'$  such that  $s[scope_t(\mathcal{R})] = s'[scope_t(\mathcal{R})]$  and  $\mathcal{R}_+(s) \neq \mathcal{R}_+(s')$ , the partial descriptions (22) for  $s$  and  $s'$  will conflict. The agent resolves this by asking (23), receiving an answer differentiating  $s$  from  $s'$  in  $\mathcal{R}_+$ .  $\square$

**Theorem 1.** Consider an agent with initial awareness  $\mathcal{X}^0 \subseteq \mathcal{X}^+, A^0 \subseteq A^+, scope_0(\mathcal{R}) \subseteq scope_+(\mathcal{R})$  following algorithm 1 (with  $\kappa = 0$ ). As  $t \rightarrow \infty$ ,  $PE(\pi_t) \rightarrow c \leq \beta$ .

*Proof.* By repeatedly applying theorems 1-3, either  $PE(\pi_t) \rightarrow c \leq \beta$  (in which case we are done), or there exists a  $K$  where  $\mathcal{A}^K = \mathcal{A}^+, \mathcal{R}_K = \mathcal{R}_+$ , and  $\mathcal{X}^K = \mathcal{B}^k \cup \mathcal{O}^K$ . Here,  $\mathcal{B}^K$  contains all variables  $B \in \mathcal{B}^+$  such that there exist  $b$ , and  $b'$  where  $b[\mathcal{B}^+ \setminus B] = b'[\mathcal{B}^+ \setminus B]$  but  $b[B] \neq b'[B]$  and  $\pi_+(b) \neq \pi_+(b')$ . In other words,  $\langle \mathcal{X}^K, \mathcal{A}^K, \mathcal{R}^K \rangle$  define a related decision problem with an identical optimal policy and marginal probability distribution to the original problem, but for which the agent is fully aware.

The BD-score is a *consistent score*, which means that as  $|D| \rightarrow \infty$ ,  $Pa^*$  contains all dependencies present in the true distribution, regardless of initial prior (assuming we have not pruned the search space, which is true in this case because  $\kappa = 0$ ). As a result, as  $t \rightarrow \infty$ , then  $\forall a \in v(\mathcal{A}^+), \forall b \in \mathcal{B}^K, \forall y \in v(scope_+(\mathcal{R}))$ , we have that  $P(y|a, b, Pa_t^*, \theta_t^*) \rightarrow P(y|a, b, Pa^+, \theta^+)$ .

Since our agents probabilistic model converges to the true probabilistic distribution, and because  $\mathcal{R}^K = \mathcal{R}^+$  and  $\mathcal{A}^K = \mathcal{A}^+$ , we have that  $\pi_t^* \rightarrow \pi_+$  and therefore that  $PE(\pi_t^*) \rightarrow 0$ .  $\square$

## 2. Derivation of Equation (7)

*Note, the derivation below corrects an error from the original Buntine (1991) paper.*

The proof that:

### 3. Specifications of IDs from Experiments + Additional Results

Tables 1-3 below provide a full specification of the three randomly generated IDs used in the Experiments Section of the main paper. All variables are binary. The numbers in the  $P(X|Pa)$  give the probability of  $X = 1$  for each possible assignment  $v(Pa)$ , where the first probability refers to the assignment of all parents to 0, and the last probability refers to the assignment of all parents to 1.

Figures 1 and 2 give the results of our experiments on the small (12 variable) and medium (24 variable) IDs, using the same experimental setup as presented in Section 4 of the main paper. As with the main paper, the default agent is able to successfully converge on the true optimal policy, despite starting out unaware of factors critical to success. However, the differences in varying the expert tolerances and between the conservative and non-conservative agents are less pronounced, simply because the underlying decision problem is simpler in the smaller cases.

$$\text{BD}_t(X, Pa_X) = \text{BD}_{t-1}(X, Pa_X) \frac{N_{i|j}^t + \alpha_{i|j} - 1}{N_{\cdot|j}^t + \alpha_{\cdot|j} - 1} \quad (7)$$

Follows from the definition of the multivariate- $\beta$  function in terms of the  $\Gamma$ -function, and the recursive structure of  $\Gamma$ :

$$\beta(n_1, \dots, n_m) = \frac{\prod_{k=0}^m \Gamma(n_k)}{\Gamma(\sum_{k=0}^m n_k)} \quad (1)$$

$$\Gamma(x) = (x-1)\Gamma(x-1) \quad (2)$$

From equation (3), we have:

$$\text{BD}_t(X, Pa_X) = P(Pa_X) \prod_{j \in v(Pa_X)} \frac{\beta(N_{0|j}^t + \alpha_{0|j}, \dots, N_{m|j}^t + \alpha_{m|j})}{\beta(\alpha_{0|j}, \dots, \alpha_{m|j})} \quad (3)$$

Lets assume that  $d_t[X] = i$  and  $d_t[Pa_X] = j$ . The only difference between  $\text{BD}_t(X, Pa_X)$  and  $\text{BD}_{t-1}(X, Pa_X)$  is between counts  $N_{i|j}^t$  and  $N_{i|j}^{t-1}$  (specifically, that  $N_{i|j}^{t-1} = N_{i|j}^t - 1$ ), so we can rewrite (3) as:

$$\begin{aligned} \text{BD}_t(X, Pa_X) &= \text{BD}_{t-1}(X, Pa) \frac{\Gamma(\sum_{k=0}^m N_{k|j}^{t-1}) \prod_{k=0}^m \Gamma(N_{k|j}^t)}{\Gamma(\sum_{k=0}^m N_{k|j}^t) \prod_{k=0}^m \Gamma(N_{k|j}^{t-1})} \\ &= \frac{\Gamma((\sum_{k=0}^m N_{k|j}^t) - 1) \Gamma(N_{i|j}^t)}{\Gamma(\sum_{k=0}^m N_{k|j}^t) \Gamma(N_{i|j}^t - 1)} \end{aligned}$$

Then, via (2), we have:

$$\begin{aligned} &\frac{\Gamma((\sum_{k=0}^m N_{k|j}^t) - 1) \Gamma(N_{i|j}^t)}{\Gamma(\sum_{k=0}^m N_{k|j}^t) \Gamma(N_{i|j}^t - 1)} \\ &= \frac{\Gamma((\sum_{k=0}^m N_{k|j}^t) - 1) (N_{i|j}^t - 1) \Gamma(N_{i|j}^t - 1)}{((\sum_{k=0}^m N_{k|j}^t) - 1) \Gamma((\sum_{k=0}^m N_{k|j}^t) - 1) \Gamma(N_{i|j}^t - 1)} \\ &= \frac{N_{i|j}^t - 1}{(\sum_{k=0}^m N_{k|j}^t) - 1} \end{aligned}$$

And therefore that:

$$\text{BD}_t(X, Pa_X) = \text{BD}_{t-1}(X, Pa_X) \frac{N_{i|j}^t + \alpha_{i|j} - 1}{N_{\cdot|j}^t + \alpha_{\cdot|j} - 1} \quad (7)$$

As required.

110  
111  
112  
113  
114  
115  
116  
117  
118  
119  
120  
121  
122  
123  
124  
125  
126  
127  
128  
129  
130  
131  
132  
133  
134  
135  
136  
137  
138  
139  
140  
141  
142  
143  
144  
145  
146  
147  
148  
149  
150  
151  
152  
153  
154  
155  
156  
157  
158  
159  
160  
161  
162  
163  
164

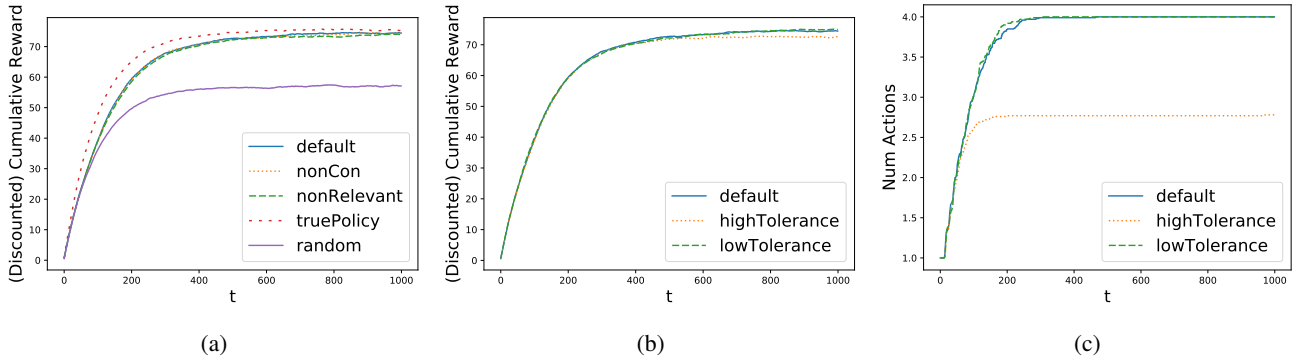

Figure 1. Rewards and size of  $|\mathcal{A}|$  over time on id-small.

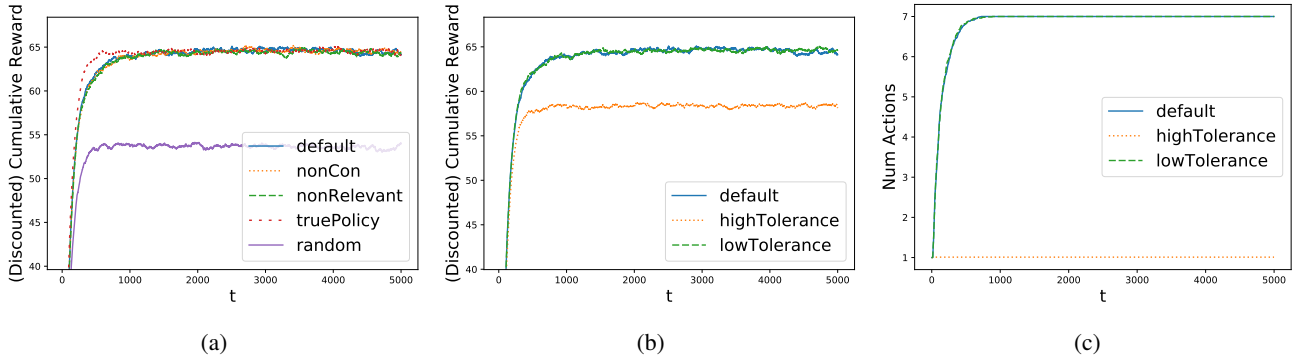

Figure 2. Rewards and size of  $|\mathcal{A}|$  over time on id-medium.

| $X$                  | $Pa_X$      | $P(X Pa_X)$                                    |
|----------------------|-------------|------------------------------------------------|
| B1                   | $\emptyset$ | 0.50                                           |
| O1                   | A4          | 0.23, 0.18                                     |
| B2                   | $\emptyset$ | 0.84                                           |
| B3                   | $\emptyset$ | 0.18                                           |
| O3                   | A1, A3, B3  | 0.31, 0.89, 0.87, 0.15, 0.48, 0.21, 0.90, 0.06 |
| B4                   | B2          | 0.45, 0.26                                     |
| O4                   | A2, B1      | 0.78, 0.87, 0.12, 0.07                         |
| O2                   | B2, B4, O1  | 0.04, 0.75, 0.64, 0.07, 0.36, 0.62, 0.69, 0.17 |
| $scope(\mathcal{R})$ |             | $\mathcal{R}(s)$                               |
| O4, O2, O3           |             | 0.98, 0.14, 0.70, 0.35, 0.38, 0.98, 0.11, 0.97 |

Table 1. id-small: (12 Variables)

165  
166  
167  
168  
169  
170  
171  
172  
173  
174  
175  
176  
177  
178  
179  
180  
181  
182  
183  
184  
185  
186  
187  
188  
189  
190  
191  
192  
193  
194  
195  
196  
197  
198  
199  
200  
201  
202  
203  
204  
205  
206  
207  
208  
209  
210  
211  
212  
213  
214  
215  
216  
217  
218  
219

---

| X                              | $Pa_X$      | $P(X Pa_X)$                                                                                       |
|--------------------------------|-------------|---------------------------------------------------------------------------------------------------|
| B8                             | $\emptyset$ | 0.05                                                                                              |
| B6                             | $\emptyset$ | 0.97                                                                                              |
| B7                             | $\emptyset$ | 0.01                                                                                              |
| B1                             | $\emptyset$ | 0.72                                                                                              |
| B4                             | $\emptyset$ | 0.08                                                                                              |
| B5                             | $\emptyset$ | 0.66                                                                                              |
| B2                             | $\emptyset$ | 0.78                                                                                              |
| B3                             | $\emptyset$ | 0.54                                                                                              |
| O3                             | A6, B4, B6  | 0.66, 0.14, 0.99, 0.83, 0.75, 0.71, 0.30, 0.12                                                    |
| O2                             | A5, A8, B5  | 0.26, 0.94, 0.67, 0.18, 0.04, 0.63, 0.87, 0.14                                                    |
| O6                             | A6, B3      | 0.87, 0.31, 0.48, 0.13                                                                            |
| O4                             | A1, B8      | 0.27, 0.51, 0.12, 0.73                                                                            |
| O8                             | A4, B2, O4  | 0.81, 0.51, 0.44, 0.44, 0.34, 0.82, 0.04, 0.56                                                    |
| O1                             | A2, A7, O3  | 0.03, 0.47, 0.74, 0.43, 0.59, 0.08, 0.60, 0.57                                                    |
| O7                             | B7, O6      | 0.83, 0.68, 0.27, 0.23                                                                            |
| O5                             | A3, B1, O7  | 0.75, 0.30, 0.25, 0.35, 0.64, 0.30, 0.31, 0.31                                                    |
| <i>scope</i> ( $\mathcal{R}$ ) |             | $\mathcal{R}$                                                                                     |
| O1, O8, O5, O2                 |             | 0.47, 0.95, 1.00, 0.18, 0.26, 0.75, 0.38, 0.76,<br>0.60, 0.78, 0.02, 0.75, 0.40, 0.32, 0.30, 0.14 |

Table 2. id-medium (24 variables)

220  
221  
222  
223  
224  
225  
226  
227  
228  
229  
230  
231  
232  
233  
234  
235  
236  
237  
238  
239  
240  
241  
242  
243  
244  
245  
246  
247  
248  
249  
250  
251  
252  
253  
254  
255  
256  
257  
258  
259  
260  
261  
262  
263  
264  
265  
266  
267  
268  
269  
270  
271  
272  
273  
274

---

| X                              | $Pa_X$        | $P(X Pa_X)$                                                                                                                                                                                             |
|--------------------------------|---------------|---------------------------------------------------------------------------------------------------------------------------------------------------------------------------------------------------------|
| B10                            | $\emptyset$   | 0.43                                                                                                                                                                                                    |
| O9                             | A12           | 0.53, 0.82                                                                                                                                                                                              |
| B11                            | $\emptyset$   | 0.59                                                                                                                                                                                                    |
| O8                             | A2            | 0.87, 0.19                                                                                                                                                                                              |
| B12                            | $\emptyset$   | 0.42                                                                                                                                                                                                    |
| B13                            | $\emptyset$   | 0.52                                                                                                                                                                                                    |
| B14                            | $\emptyset$   | 0.76                                                                                                                                                                                                    |
| B15                            | $\emptyset$   | 0.12                                                                                                                                                                                                    |
| O2                             | A1, A6, A8    | 0.43, 0.89, 0.00, 0.18, 0.19, 0.76, 0.76, 0.67                                                                                                                                                          |
| B8                             | $\emptyset$   | 0.28                                                                                                                                                                                                    |
| B9                             | $\emptyset$   | 0.26                                                                                                                                                                                                    |
| B6                             | $\emptyset$   | 0.96                                                                                                                                                                                                    |
| B7                             | $\emptyset$   | 0.27                                                                                                                                                                                                    |
| B1                             | $\emptyset$   | 0.99                                                                                                                                                                                                    |
| B4                             | $\emptyset$   | 0.99                                                                                                                                                                                                    |
| B5                             | $\emptyset$   | 0.13                                                                                                                                                                                                    |
| B2                             | $\emptyset$   | 0.77                                                                                                                                                                                                    |
| B3                             | $\emptyset$   | 0.01                                                                                                                                                                                                    |
| O3                             | B2, B9, O2    | 0.31, 0.21, 0.71, 0.65, 0.78, 0.17, 0.67, 0.92                                                                                                                                                          |
| O6                             | A3, B6, B11   | 0.28, 0.41, 0.55, 0.42, 0.93, 0.58, 0.44, 0.74                                                                                                                                                          |
| O5                             | A13, B3, B4   | 0.17, 0.66, 0.93, 0.62, 0.47, 0.08, 0.82, 0.86                                                                                                                                                          |
| O15                            | A2, A11, O8   | 0.92, 0.34, 0.25, 0.48, 0.43, 0.25, 0.52, 0.32                                                                                                                                                          |
| O14                            | A10, B5, B8   | 0.37, 0.91, 0.75, 0.86, 0.29, 0.33, 0.96, 0.84                                                                                                                                                          |
| O13                            | A4, A7, B1    | 0.37, 0.40, 0.74, 0.94, 0.67, 0.70, 0.66, 0.46                                                                                                                                                          |
| O7                             | B7, B15, O6   | 0.31, 0.69, 0.17, 0.56, 0.88, 0.40, 0.65, 0.91                                                                                                                                                          |
| O4                             | A14, O3, O9   | 0.31, 1.00, 0.59, 0.81, 0.08, 0.20, 0.02, 0.63                                                                                                                                                          |
| O12                            | B13, B14, O13 | 0.55, 0.71, 0.61, 0.22, 0.51, 0.90, 0.37, 0.52                                                                                                                                                          |
| O11                            | A5, B10, O5   | 0.73, 0.65, 0.42, 0.47, 0.42, 0.34, 0.97, 0.33                                                                                                                                                          |
| O10                            | A15, B12, O15 | 0.06, 0.80, 0.42, 0.36, 0.62, 0.97, 0.15, 0.29                                                                                                                                                          |
| O1                             | A9, O7, O11   | 0.48, 0.03, 0.14, 0.41, 0.16, 0.64, 0.22, 0.19                                                                                                                                                          |
| <i>scope</i> ( $\mathcal{R}$ ) |               | $\mathcal{R}$                                                                                                                                                                                           |
| O1, O4, O14, O10, O12          |               | 0.28, 0.19, 0.91, 0.71, 0.68, 0.57, 0.98, 0.86,<br>0.96, 0.54, 0.19, 0.20, 0.72, 0.61, 0.32, 0.65,<br>0.64, 0.12, 0.64, 0.67, 0.72, 0.27, 0.05, 0.07,<br>0.63, 0.09, 0.55, 0.45, 0.19, 0.02, 0.51, 0.13 |

Table 3. id-large (36 variables)
